# Supplementary material
Source: publisher site journal article supplement (https://www.dovepress.com/article/608956)
Supplement: Supplementary file 1 [file 608956%20Revised%20Supplementary%20Material.docx]

**Supplementary Table S1. Effect size estimates for key comparisons**

Hedges g is reported as the small-sample corrected standardized mean difference. Confidence intervals are approximate 95% CIs. Positive values indicate higher values in Group 2 relative to Group 1; negative values indicate lower values in Group 2 relative to Group 1. Mean and SD values are rounded to two decimal places.

| **Figure** | **Panel** | **Outcome** | **Time/marker** | **Group 1 mean±SD (n)** | **Group 2 mean±SD (n)** | **Mean difference** | **Hedges g (95% CI)** |
| --- | --- | --- | --- | --- | --- | --- | --- |
| Figure 1 | b | Ipsilateral PWT | Pre | Nerve injury: 14.35±3.03 (n=6) | Nerve injury+6-OHDA: 15.27±2.95 (n=6) | 0.92 | 0.29 (-0.77 to 1.34) |
| Figure 1 | b | Ipsilateral PWT | 1day | Nerve injury: 4.87±1.92 (n=6) | Nerve injury+6-OHDA: 8.99±1.40 (n=6) | 4.11 | 2.26 (0.82 to 3.70) |
| Figure 1 | b | Ipsilateral PWT | 3day | Nerve injury: 4.25±3.13 (n=6) | Nerve injury+6-OHDA: 8.71±2.00 (n=6) | 4.46 | 1.57 (0.32 to 2.82) |
| Figure 1 | b | Ipsilateral PWT | 5day | Nerve injury: 4.94±2.76 (n=6) | Nerve injury+6-OHDA: 8.80±2.51 (n=6) | 3.85 | 1.35 (0.15 to 2.55) |
| Figure 1 | b | Ipsilateral PWT | 7day | Nerve injury: 3.56±2.05 (n=6) | Nerve injury+6-OHDA: 8.43±1.39 (n=6) | 4.87 | 2.56 (1.03 to 4.10) |
| Figure 1 | c | Contralateral PWT | Pre | Nerve injury: 14.50±1.83 (n=6) | Nerve injury+6-OHDA: 15.66±3.01 (n=6) | 1.16 | 0.43 (-0.63 to 1.49) |
| Figure 1 | c | Contralateral PWT | 1day | Nerve injury: 13.22±3.55 (n=6) | Nerve injury+6-OHDA: 14.19±2.70 (n=6) | 0.97 | 0.28 (-0.77 to 1.34) |
| Figure 1 | c | Contralateral PWT | 3day | Nerve injury: 13.77±4.55 (n=6) | Nerve injury+6-OHDA: 14.18±4.10 (n=6) | 0.41 | 0.09 (-0.96 to 1.13) |
| Figure 1 | c | Contralateral PWT | 5day | Nerve injury: 13.94±2.99 (n=6) | Nerve injury+6-OHDA: 14.75±3.59 (n=6) | 0.81 | 0.23 (-0.82 to 1.27) |
| Figure 1 | c | Contralateral PWT | 7day | Nerve injury: 15.03±3.52 (n=6) | Nerve injury+6-OHDA: 13.94±5.01 (n=6) | -1.09 | -0.23 (-1.28 to 0.82) |
| Figure 2 | b | Relative fluorescence density | P2Y12 | SHAM: 1.04±0.11 (n=6) | SNL: 2.26±0.58 (n=6) | 1.22 | 2.67 (1.10 to 4.24) |
| Figure 2 | b | Relative fluorescence density | P2Y12 | SNL: 2.26±0.58 (n=6) | SNL+6-OHDA: 1.35±0.41 (n=6) | -0.91 | -1.66 (-2.93 to -0.38) |
| Figure 2 | b | Relative fluorescence density | CD11b | SHAM: 0.99±0.15 (n=6) | SNL: 3.41±0.46 (n=6) | 2.42 | 6.55 (3.50 to 9.61) |
| Figure 2 | b | Relative fluorescence density | CD11b | SNL: 3.41±0.46 (n=6) | SNL+6-OHDA: 1.54±0.33 (n=6) | -1.87 | -4.33 (-6.50 to -2.16) |
| Figure 2 | d | P2Y12/GAPDH | value | SHAM: 0.98±0.23 (n=6) | SNL: 3.35±0.51 (n=6) | 2.37 | 5.54 (2.90 to 8.19) |
| Figure 2 | d | P2Y12/GAPDH | value | SNL: 3.35±0.51 (n=6) | SNL+6: 1.92±0.51 (n=6) | -1.43 | -2.59 (-4.13 to -1.04) |
| Figure 2 | e | Iba-1/GAPDH | value | SHAM: 0.98±0.24 (n=6) | SNL: 3.21±0.38 (n=6) | 2.23 | 6.45 (3.44 to 9.46) |
| Figure 2 | e | Iba-1/GAPDH | value | SNL: 3.21±0.38 (n=6) | SNL+6: 1.63±0.41 (n=6) | -1.58 | -3.70 (-5.63 to -1.77) |
| Figure 2 | f | p-p38/p38 | value | SHAM: 1.07±0.31 (n=6) | SNL: 2.47±0.24 (n=6) | 1.40 | 4.64 (2.36 to 6.93) |
| Figure 2 | f | p-p38/p38 | value | SNL: 2.47±0.24 (n=6) | SNL+6-OHDA: 1.78±0.39 (n=6) | -0.68 | -1.96 (-3.32 to -0.61) |
| Figure 2 | g | Spinal cytokine (pg/mg protein) | tnf | SHAM: 23.67±17.05 (n=6) | SNL: 509.01±58.47 (n=6) | 485.33 | 10.40 (5.73 to 15.08) |
| Figure 2 | g | Spinal cytokine (pg/mg protein) | tnf | SNL: 509.01±58.47 (n=6) | SNL+6-OHDA: 218.51±88.26 (n=6) | -290.50 | -3.58 (-5.47 to -1.70) |
| Figure 2 | g | Spinal cytokine (pg/mg protein) | il-1b | SHAM: 33.51±25.59 (n=6) | SNL: 506.67±87.88 (n=6) | 473.17 | 6.75 (3.61 to 9.89) |
| Figure 2 | g | Spinal cytokine (pg/mg protein) | il-1b | SNL: 506.67±87.88 (n=6) | SNL+6-OHDA: 267.01±117.85 (n=6) | -239.67 | -2.13 (-3.53 to -0.73) |
| Figure 2 | g | Spinal cytokine (pg/mg protein) | il-6 | SHAM: 33.17±27.29 (n=6) | SNL: 433.67±50.98 (n=6) | 400.50 | 9.04 (4.94 to 13.14) |
| Figure 2 | g | Spinal cytokine (pg/mg protein) | il-6 | SNL: 433.67±50.98 (n=6) | SNL+6-OHDA: 184.01±63.87 (n=6) | -249.67 | -3.99 (-6.02 to -1.95) |
| Figure 3 | b | Ipsilateral PWT | 0 | SHAM: 13.62±2.83 (n=6) | SNL: 14.07±2.87 (n=6) | 0.45 | 0.15 (-0.90 to 1.19) |
| Figure 3 | b | Ipsilateral PWT | 0 | SNL: 14.07±2.87 (n=6) | SNL+tica: 12.45±1.32 (n=6) | -1.62 | -0.67 (-1.75 to 0.42) |
| Figure 3 | b | Ipsilateral PWT | 1day | SHAM: 14.14±2.61 (n=6) | SNL: 6.44±2.35 (n=6) | -7.70 | -2.86 (-4.49 to -1.23) |
| Figure 3 | b | Ipsilateral PWT | 1day | SNL: 6.44±2.35 (n=6) | SNL+tica: 9.57±1.43 (n=6) | 3.13 | 1.49 (0.26 to 2.72) |
| Figure 3 | b | Ipsilateral PWT | 3day | SHAM: 14.72±2.08 (n=6) | SNL: 4.51±2.03 (n=6) | -10.22 | -4.58 (-6.85 to -2.32) |
| Figure 3 | b | Ipsilateral PWT | 3day | SNL: 4.51±2.03 (n=6) | SNL+tica: 10.02±2.43 (n=6) | 5.52 | 2.28 (0.83 to 3.72) |
| Figure 3 | b | Ipsilateral PWT | 5day | SHAM: 15.12±2.52 (n=6) | SNL: 5.12±1.84 (n=6) | -10.00 | -4.18 (-6.28 to -2.07) |
| Figure 3 | b | Ipsilateral PWT | 5day | SNL: 5.12±1.84 (n=6) | SNL+tica: 9.04±3.39 (n=6) | 3.92 | 1.32 (0.13 to 2.52) |
| Figure 3 | b | Ipsilateral PWT | 7day | SHAM: 13.71±1.85 (n=6) | SNL: 4.64±2.04 (n=6) | -9.07 | -4.30 (-6.45 to -2.15) |
| Figure 3 | b | Ipsilateral PWT | 7day | SNL: 4.64±2.04 (n=6) | SNL+tica: 7.84±2.04 (n=6) | 3.20 | 1.45 (0.23 to 2.67) |
| Figure 3 | c | Contralateral PWT | 0 | SHAM: 13.92±2.61 (n=6) | SNL: 13.49±1.55 (n=6) | -0.43 | -0.19 (-1.23 to 0.86) |
| Figure 3 | c | Contralateral PWT | 0 | SNL: 13.49±1.55 (n=6) | SNL+tica: 11.52±1.85 (n=6) | -1.97 | -1.06 (-2.21 to 0.08) |
| Figure 3 | c | Contralateral PWT | 1 | SHAM: 13.69±2.85 (n=6) | SNL: 11.26±2.45 (n=6) | -2.43 | -0.85 (-1.95 to 0.26) |
| Figure 3 | c | Contralateral PWT | 1 | SNL: 11.26±2.45 (n=6) | SNL+tica: 12.72±4.46 (n=6) | 1.47 | 0.38 (-0.68 to 1.43) |
| Figure 3 | c | Contralateral PWT | 3 | SHAM: 13.47±1.77 (n=6) | SNL: 13.86±2.73 (n=6) | 0.38 | 0.15 (-0.89 to 1.20) |
| Figure 3 | c | Contralateral PWT | 3 | SNL: 13.86±2.73 (n=6) | SNL+tica: 11.91±1.54 (n=6) | -1.95 | -0.81 (-1.92 to 0.29) |
| Figure 3 | c | Contralateral PWT | 5 | SHAM: 14.96±2.29 (n=6) | SNL: 13.69±2.62 (n=6) | -1.27 | -0.48 (-1.54 to 0.59) |
| Figure 3 | c | Contralateral PWT | 5 | SNL: 13.69±2.62 (n=6) | SNL+tica: 13.05±3.08 (n=6) | -0.63 | -0.21 (-1.25 to 0.84) |
| Figure 3 | c | Contralateral PWT | 7 | SHAM: 13.99±2.23 (n=6) | SNL: 13.62±1.47 (n=6) | -0.37 | -0.18 (-1.23 to 0.87) |
| Figure 3 | c | Contralateral PWT | 7 | SNL: 13.62±1.47 (n=6) | SNL+tica: 12.69±1.97 (n=6) | -0.93 | -0.50 (-1.56 to 0.57) |
| Figure 3 | e | Relative fluorescence density | IBA-1 | SHAM: 1.04±0.11 (n=6) | SNL: 2.42±0.46 (n=6) | 1.38 | 3.79 (1.83 to 5.75) |
| Figure 3 | e | Relative fluorescence density | IBA-1 | SNL: 2.42±0.46 (n=6) | SNL+tica: 1.17±0.22 (n=6) | -1.26 | -3.19 (-4.94 to -1.45) |
| Figure 3 | e | Relative fluorescence density | PP38 | SHAM: 0.99±0.15 (n=6) | SNL: 1.97±0.34 (n=6) | 0.98 | 3.42 (1.59 to 5.24) |
| Figure 3 | e | Relative fluorescence density | PP38 | SNL: 1.97±0.34 (n=6) | SNL+tica: 1.29±0.26 (n=6) | -0.68 | -2.06 (-3.44 to -0.68) |
| Figure 3 | f | Spinal cytokine (pg/mg protein) | tnf | SHAM: 23.67±17.05 (n=6) | SNL: 475.34±122.41 (n=6) | 451.67 | 4.77 (2.43 to 7.11) |
| Figure 3 | f | Spinal cytokine (pg/mg protein) | tnf | SNL: 475.34±122.41 (n=6) | SNL+tica: 152.17±60.91 (n=6) | -323.17 | -3.09 (-4.79 to -1.38) |
| Figure 3 | f | Spinal cytokine (pg/mg protein) | il-1b | SHAM: 37.84±22.87 (n=6) | SNL: 498.34±68.18 (n=6) | 460.50 | 8.36 (4.55 to 12.17) |
| Figure 3 | f | Spinal cytokine (pg/mg protein) | il-1b | SNL: 498.34±68.18 (n=6) | SNL+tica: 130.84±24.31 (n=6) | -367.50 | -6.63 (-9.71 to -3.54) |
| Figure 3 | f | Spinal cytokine (pg/mg protein) | il-6 | SHAM: 33.52±27.04 (n=6) | SNL: 433.68±50.98 (n=6) | 400.16 | 9.05 (4.95 to 13.15) |
| Figure 3 | f | Spinal cytokine (pg/mg protein) | il-6 | SNL: 433.68±50.98 (n=6) | SNL+tica: 146.41±25.12 (n=6) | -287.27 | -6.60 (-9.67 to -3.52) |
| Figure 4 | b | AUC of ipsilateral PWT | AUC | SNL: 25.09±8.78 (n=6) | SNL+6-OHDA: 50.11±4.94 (n=6) | 25.02 | 3.24 (1.48 to 5.01) |
| Figure 4 | b | AUC of ipsilateral PWT | AUC | SNL: 25.09±8.78 (n=6) | SNL+ticagrelor: 55.83±10.79 (n=6) | 30.73 | 2.88 (1.24 to 4.52) |
| Figure 4 | b | AUC of ipsilateral PWT | AUC | SNL: 25.09±8.78 (n=6) | SNL+combined 6-OHDA/ticagrelor: 52.85±9.28 (n=6) | 27.76 | 2.84 (1.21 to 4.46) |
| Figure S1 | c | Splenic TH fluorescence | TH | Control: 176.22±15.14 (n=6) | 6-OHDA: 12.29±4.04 (n=6) | -163.94 | -13.65 (-19.23 to -8.08) |

**
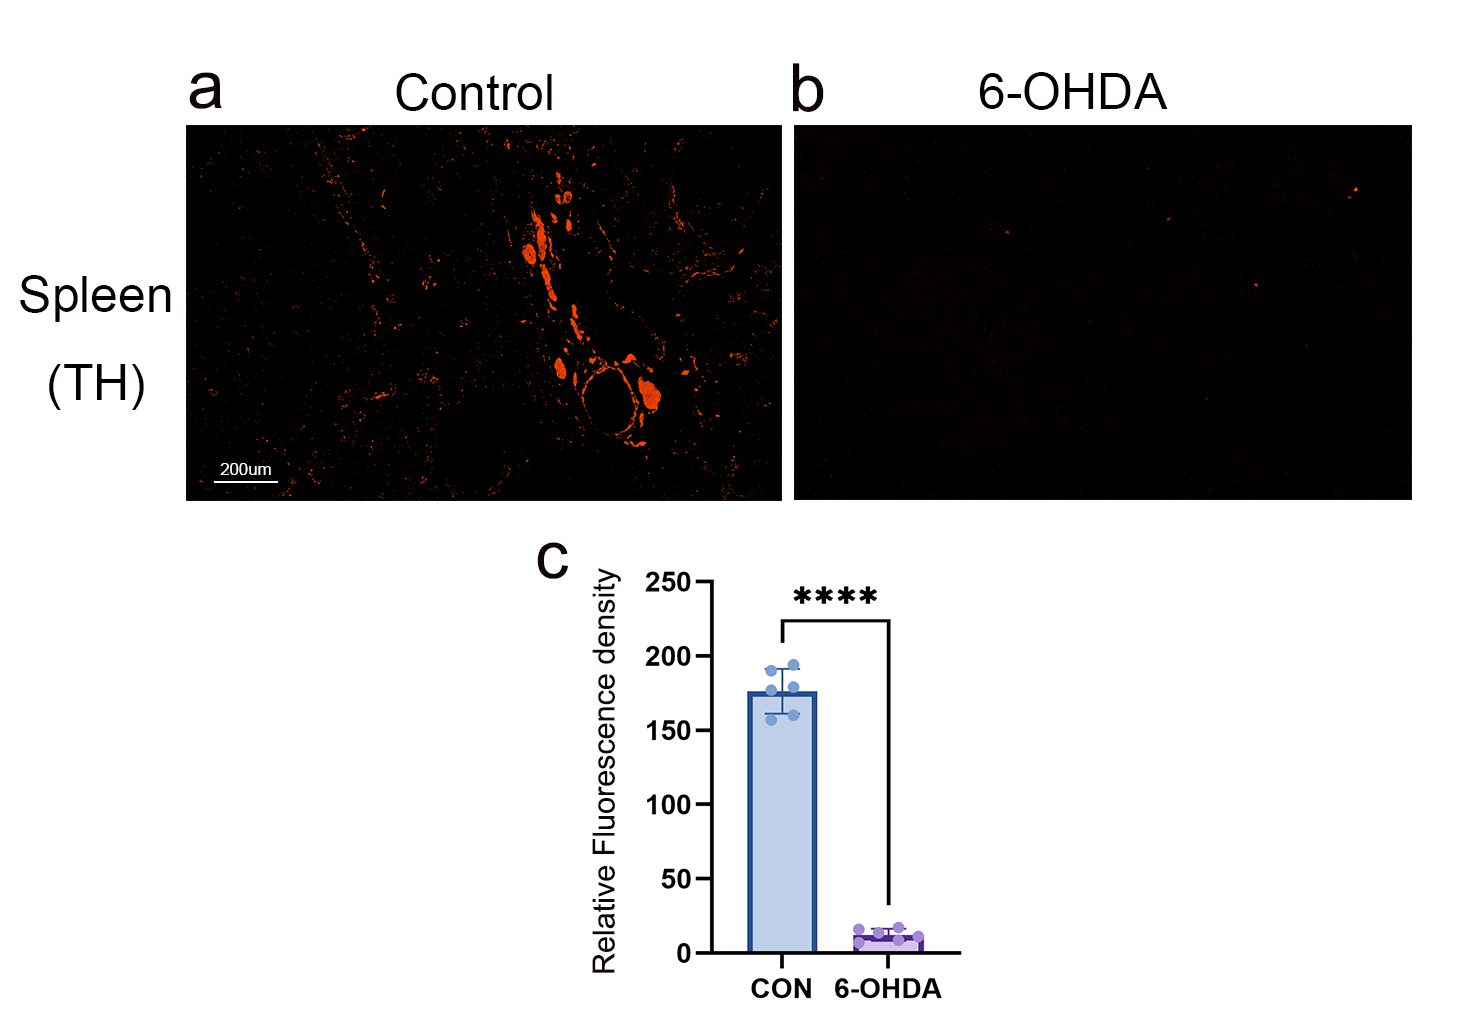
**

**Figure S1. Systemic 6-OHDA administration depletes peripheral sympathetic innervation in the spleen.**

(a) Representative TH immunofluorescence image of splenic tissue from vehicle-treated control rats, showing dense TH-positive sympathetic fibers along the splenic vasculature. (b) Representative TH immunofluorescence image of splenic tissue from 6-OHDA-treated rats, showing marked depletion of TH-positive fibers. Scale bar=200 um. (c) Quantification of relative TH fluorescence density. 6-OHDA reduced TH fluorescence from 176.22±6.18 to 12.29±1.65 (Hedges’ g=-13.65, 95% CI -19.23 to -8.08). Data are mean ± SD (n=6). ****p<0.0001 vs control; unpaired two-tailed Welch's t test.
